# Supplementary material
Source: Springer Nature journal article supplement (https://www.springermedizin.de/resource/supplementary/12985_2009_758_MOESM4_ESM.pdf/9608640)

**A**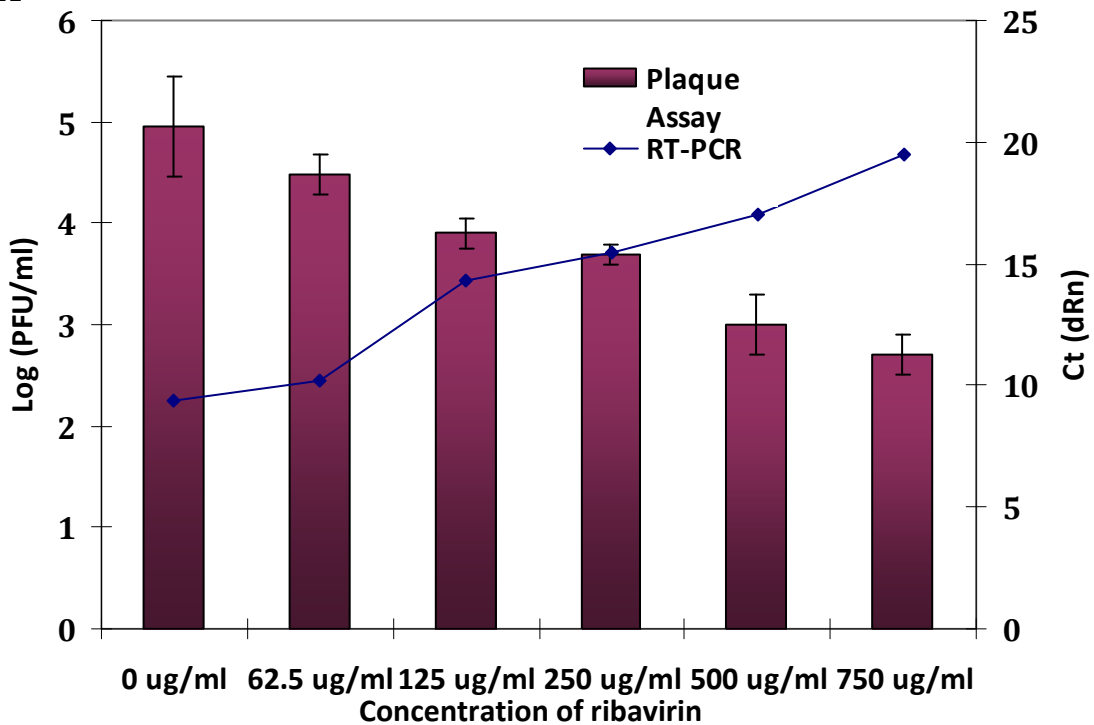**B**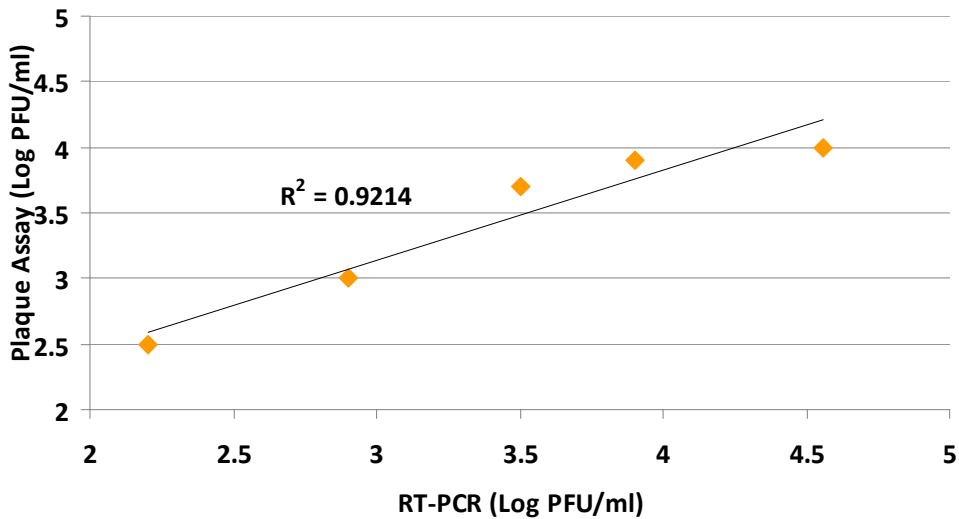

Supplement: MOESM4 [file 9608640]
